# Supplementary material for: Saliva-Derived Commensal and Pathogenic Biofilms in a Human Gingiva Model
Source: PubMed Central journal article supplement (PMC6429568; doi:10.1177/0022034517729998), 2017-09-11
Supplement: DS_10.1177_0022034517729998.pdf [file DS_10.1177_0022034517729998.pdf]

# Saliva-Derived Commensal and Pathogenic Biofilms in a Human Gingiva Model

J.K. Buskermolen, M.M. Janus, S. Roffel, B.P. Krom, and S. Gibbs

## Appendix

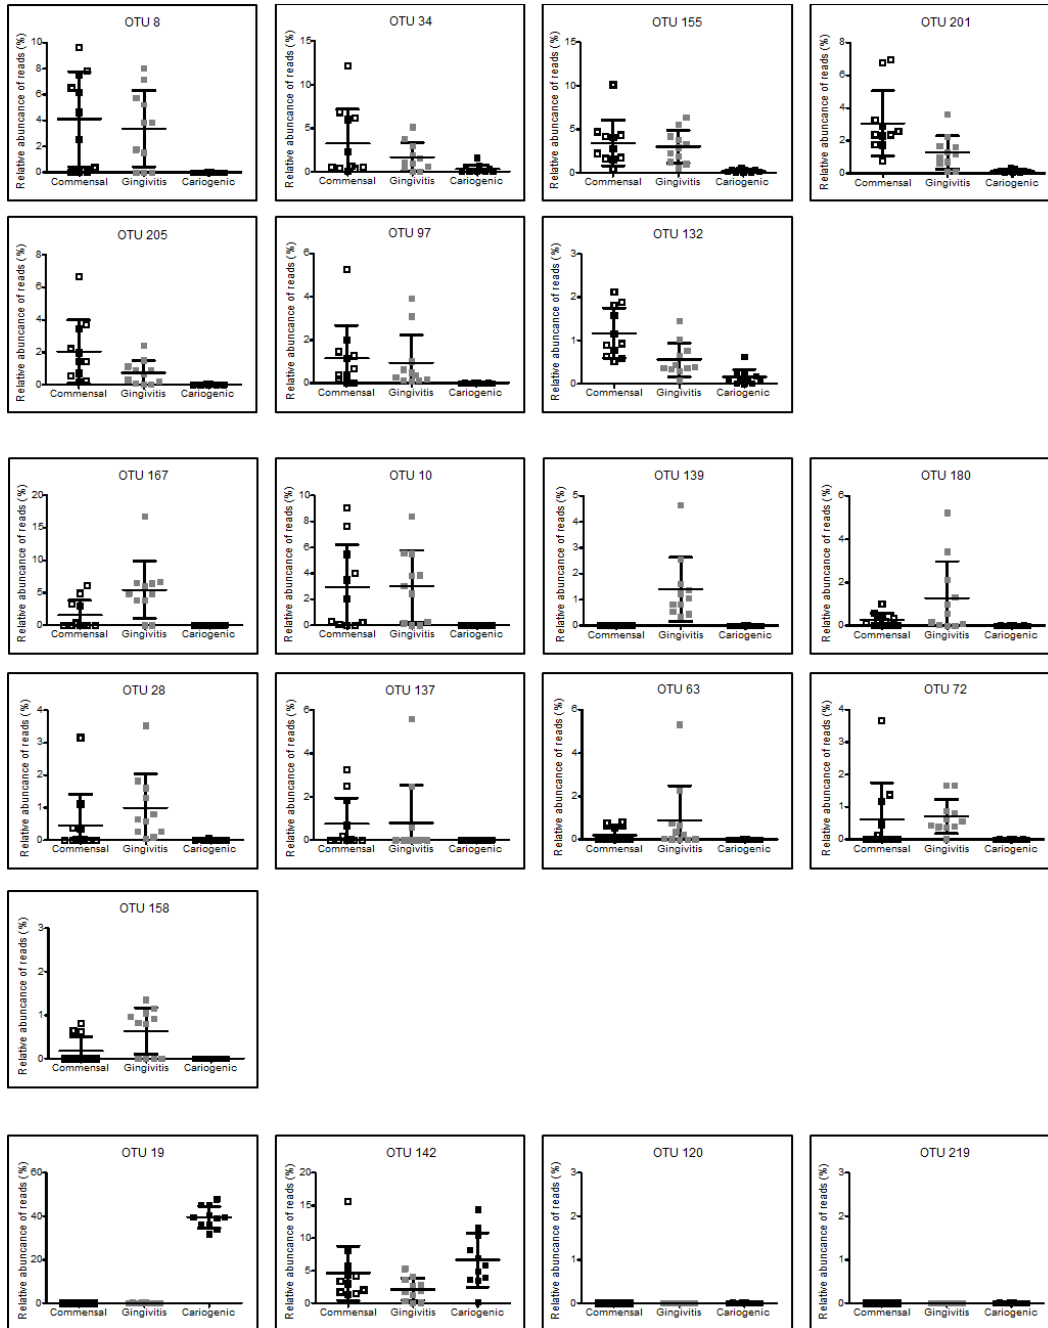

**Appendix Figure.** Relative abundance of all biomarkers detected with LefSe at LDA threshold 3.5. A) Biomarkers for commensal biofilms, B) biomarkers for gingivitis biofilms, C) biomarkers for cariogenic biofilms.

## Appendix Table

| OTU         | RDP                                                                                                          | Commensal | Gingivitis | Cariogenic |
|-------------|--------------------------------------------------------------------------------------------------------------|-----------|------------|------------|
| OTU<br>_22  | Bacteria; Firmicutes; Negativicutes;<br>Selenomonadales; Veillonellaceae; Veillonella                        | 1092      | 1937       | 2323       |
| OTU<br>_19  | Bacteria; Firmicutes; Bacilli; Lactobacillales;<br>Streptococcaceae; Streptococcus                           | 2         | 5          | 3128       |
| OTU<br>_3   | Bacteria; Firmicutes; Negativicutes;<br>Selenomonadales; Veillonellaceae; Veillonella                        | 706       | 786        | 558        |
| OTU<br>_142 | Bacteria; Proteobacteria;<br>Gammaproteobacteria; Pasteurellales;<br>Pasteurellaceae; Actinobacillus         | 393       | 136        | 340        |
| OTU<br>_54  | Bacteria; Firmicutes; Bacilli; Lactobacillales;<br>Streptococcaceae; Streptococcus                           | 93        | 106        | 86         |
| OTU<br>_15  | Bacteria; Firmicutes; Bacilli; Lactobacillales;<br>Streptococcaceae; Streptococcus                           | 170       | 50         | 217        |
| OTU<br>_276 | Bacteria; Firmicutes; Negativicutes;<br>Selenomonadales; Veillonellaceae;<br>Megasphaera                     | 1115      | 48         | 27         |
| OTU<br>_167 | Bacteria; Firmicutes; Clostridia; Clostridiales;<br>Peptostreptococcaceae; Peptostreptococcus                | 422       | 264        | 2          |
| OTU<br>_10  | Bacteria; Firmicutes; Clostridia; Clostridiales;<br>Clostridiales_Incertae_Sedis_XI; Parvimonas              | 20        | 580        | 0          |
| OTU<br>_8   | Bacteria; Fusobacteria; Fusobacteria;<br>Fusobacteriales; Fusobacteriaceae;<br>Fusobacterium                 | 450       | 493        | 0          |
| OTU<br>_17  | Bacteria; Firmicutes; Clostridia; Clostridiales;<br>Clostridiales_Incertae_Sedis_XI; Parvimonas              | 558       | 11         | 0          |
| OTU<br>_34  | Bacteria; Fusobacteria; Fusobacteria;<br>Fusobacteriales; Fusobacteriaceae;<br>Fusobacterium                 | 7         | 65         | 40         |
| OTU<br>_155 | Bacteria; Firmicutes; Erysipelotrichia;<br>Erysipelotrichales; Erysipelotrichaceae;<br>Solobacterium         | 154       | 289        | 24         |
| OTU<br>_97  | Bacteria; Proteobacteria;<br>Epsilonproteobacteria; Campylobacteriales;<br>Campylobacteraceae; Campylobacter | 88        | 44         | 1          |
| OTU<br>_126 | Bacteria; Bacteroidetes; Bacteroidia;<br>Bacteroidales; Prevotellaceae; Prevotella                           | 586       | 684        | 23         |
| OTU<br>_90  | Bacteria; Proteobacteria;<br>Gammaproteobacteria; Pasteurellales;<br>Pasteurellaceae                         | 152       | 51         | 29         |
| OTU<br>_205 | Bacteria; Firmicutes; Bacilli; Bacillales;<br>Bacillales_Incertae_Sedis_XI; Gemella                          | 38        | 2          | 2          |
| OTU<br>_20  | Bacteria; Bacteroidetes; Bacteroidia;<br>Bacteroidales; Prevotellaceae; Prevotella                           | 106       | 92         | 21         |
| OTU         | Bacteria; Firmicutes; Bacilli; Lactobacillales;                                                              | 199       | 81         | 6          |

|             |                                                                                                                    |    |     |    |
|-------------|--------------------------------------------------------------------------------------------------------------------|----|-----|----|
| _201        | Carnobacteriaceae; Granulicatella                                                                                  |    |     |    |
| OTU<br>_132 | Bacteria; Proteobacteria;<br>Epsilonproteobacteria; Campylobacterales;<br>Campylobacteraceae; Campylobacter        | 44 | 21  | 15 |
| OTU<br>_137 | Bacteria; Bacteroidetes; Bacteroidia;<br>Bacteroidales; Prevotellaceae; Prevotella                                 | 48 | 0   | 0  |
| OTU<br>_182 | Bacteria; Bacteroidetes; Bacteroidia;<br>Bacteroidales; Prevotellaceae; Prevotella                                 | 0  | 0   | 0  |
| OTU<br>_28  | Bacteria; Firmicutes; Clostridia; Clostridiales;<br>Lachnospiraceae; Oribacterium                                  | 26 | 111 | 0  |
| OTU<br>_139 | Bacteria; Firmicutes; Clostridia; Clostridiales;<br>Lachnospiraceae; Catonella                                     | 0  | 58  | 0  |
| OTU<br>_35  | Bacteria; Firmicutes; Bacilli; Lactobacillales;<br>Streptococcaceae; Streptococcus                                 | 0  | 15  | 0  |
| OTU<br>_70  | Bacteria; Bacteroidetes; Bacteroidia;<br>Bacteroidales; Porphyromonadaceae;<br>Porphyromonas                       | 4  | 6   | 0  |
| OTU<br>_63  | Bacteria; Fusobacteria; Fusobacteria;<br>Fusobacteriales; Leptotrichiaceae; Leptotrichia                           | 0  | 25  | 0  |
| OTU<br>_72  | Bacteria; Firmicutes; Clostridia; Clostridiales;<br>Lachnospiraceae; Oribacterium                                  | 32 | 55  | 0  |
| OTU<br>_29  | Bacteria; Firmicutes; Bacilli; Lactobacillales;<br>Streptococcaceae; Streptococcus                                 | 63 | 237 | 1  |
| OTU<br>_128 | Bacteria; Bacteroidetes; Bacteroidia;<br>Bacteroidales; Prevotellaceae; Prevotella                                 | 0  | 0   | 0  |
| OTU<br>_158 | Bacteria; Firmicutes; Clostridia; Clostridiales;<br>Peptostreptococcaceae;<br>Peptostreptococcaceae_incertae_sedis | 44 | 58  | 0  |
| OTU<br>_180 | Bacteria; Bacteroidetes; Bacteroidia;<br>Bacteroidales; Prevotellaceae; Prevotella                                 | 13 | 11  | 2  |
| OTU<br>_14  | Bacteria; Actinobacteria; Actinobacteria;<br>Actinomycetales; Actinomycetaceae;<br>Actinomyces                     | 10 | 7   | 2  |
| OTU<br>_119 | Bacteria; Firmicutes; Clostridia; Clostridiales;<br>Eubacteriaceae; Eubacterium                                    | 0  | 27  | 0  |
| OTU<br>_53  | Bacteria; Proteobacteria; Betaproteobacteria;<br>Neisseriales; Neisseriaceae                                       | 1  | 16  | 0  |
| OTU<br>_240 | Bacteria; Bacteroidetes; Bacteroidia;<br>Bacteroidales; Prevotellaceae; Prevotella                                 | 1  | 10  | 1  |
| OTU<br>_268 | Bacteria; Firmicutes; Negativicutes;<br>Selenomonadales; Veillonellaceae                                           | 0  | 70  | 0  |
| OTU<br>_133 | Bacteria; Proteobacteria; Betaproteobacteria;<br>Neisseriales; Neisseriaceae; Neisseria                            | 0  | 0   | 1  |
| OTU<br>_106 | Bacteria; Firmicutes; Clostridia; Clostridiales;<br>Lachnospiraceae; Syntrophococcus                               | 0  | 27  | 1  |
| OTU<br>_198 | Bacteria; Firmicutes; Bacilli; Lactobacillales;<br>Streptococcaceae; Streptococcus                                 | 0  | 0   | 11 |

|             |                                                                                                         |    |    |    |
|-------------|---------------------------------------------------------------------------------------------------------|----|----|----|
| OTU<br>_77  | Bacteria; Actinobacteria; Actinobacteria;<br>Coriobacteriales; Coriobacteriaceae; Atopobium             | 13 | 6  | 1  |
| OTU<br>_23  | Bacteria; Firmicutes; Negativicutes;<br>Selenomonadales; Veillonellaceae; Veillonella                   | 0  | 0  | 13 |
| OTU<br>_185 | Bacteria; Firmicutes; Negativicutes;<br>Selenomonadales; Veillonellaceae; Dialister                     | 0  | 0  | 0  |
| OTU<br>_190 | Bacteria; Bacteroidetes; Bacteroidia;<br>Bacteroidales; Prevotellaceae; Prevotella                      | 0  | 0  | 0  |
| OTU<br>_115 | Bacteria; Bacteroidetes; Bacteroidia;<br>Bacteroidales; Prevotellaceae                                  | 2  | 2  | 0  |
| OTU<br>_181 | Bacteria; Bacteroidetes; Bacteroidia;<br>Bacteroidales; Prevotellaceae; Prevotella                      | 0  | 0  | 0  |
| OTU<br>_43  | Bacteria; Bacteroidetes; Bacteroidia;<br>Bacteroidales; Prevotellaceae; Prevotella                      | 7  | 0  | 1  |
| OTU<br>_184 | Bacteria; Firmicutes; Bacilli; Lactobacillales;<br>Streptococcaceae; Streptococcus                      | 18 | 47 | 0  |
| OTU<br>_21  | Bacteria; Firmicutes; Bacilli; Lactobacillales;<br>Streptococcaceae; Streptococcus                      | 0  | 0  | 1  |
| OTU<br>_263 | Bacteria; Firmicutes; Negativicutes;<br>Selenomonadales; Veillonellaceae; Dialister                     | 0  | 0  | 0  |
| OTU<br>_84  | Bacteria; Proteobacteria;<br>Gammaproteobacteria; Pasteurellales;<br>Pasteurellaceae                    | 9  | 5  | 3  |
| OTU<br>_300 | Bacteria; Bacteroidetes; Bacteroidia;<br>Bacteroidales; Prevotellaceae; Prevotella                      | 80 | 90 | 0  |
| OTU<br>_141 | Bacteria; Bacteroidetes; Bacteroidia;<br>Bacteroidales; Prevotellaceae; Prevotella                      | 0  | 33 | 0  |
| OTU<br>_47  | Bacteria; Bacteroidetes; Bacteroidia;<br>Bacteroidales; Prevotellaceae; Prevotella                      | 0  | 0  | 0  |
| OTU<br>_151 | Bacteria; Proteobacteria;<br>Gammaproteobacteria; Pasteurellales;<br>Pasteurellaceae; Haemophilus       | 8  | 3  | 1  |
| OTU<br>_202 | Bacteria; Bacteroidetes; Bacteroidia;<br>Bacteroidales; Prevotellaceae; Prevotella                      | 0  | 23 | 0  |
| OTU<br>_226 | Bacteria; Bacteroidetes; Bacteroidia;<br>Bacteroidales                                                  | 8  | 6  | 1  |
| OTU<br>_57  | Bacteria; Bacteroidetes; Bacteroidia;<br>Bacteroidales; Prevotellaceae; Prevotella                      | 0  | 28 | 0  |
| OTU<br>_307 | Bacteria; Proteobacteria;<br>Gammaproteobacteria; Enterobacteriales;<br>Enterobacteriaceae; Yersinia    | 30 | 11 | 0  |
| OTU<br>_280 | Bacteria; Firmicutes; Clostridia; Clostridiales;<br>Clostridiales_Incertae_Sedis_XIII;<br>Mogibacterium | 0  | 30 | 0  |
| OTU<br>_146 | Bacteria; Firmicutes; Clostridia; Clostridiales;<br>Lachnospiraceae                                     | 0  | 2  | 1  |
| OTU         | Bacteria; Bacteroidetes; Bacteroidia;                                                                   | 0  | 6  | 0  |

|             |                                                                                                                    |    |    |   |
|-------------|--------------------------------------------------------------------------------------------------------------------|----|----|---|
| _290        | Bacteroidales; Prevotellaceae; Paraprevotella                                                                      |    |    |   |
| OTU<br>_189 | Bacteria; Firmicutes; Clostridia; Clostridiales;<br>Lachnospiraceae                                                | 0  | 0  | 5 |
| OTU<br>_186 | Bacteria; Bacteroidetes; Bacteroidia;<br>Bacteroidales; Prevotellaceae; Prevotella                                 | 0  | 2  | 0 |
| OTU<br>_9   | Bacteria; Firmicutes; Bacilli; Lactobacillales;<br>Streptococcaceae; Streptococcus                                 | 0  | 0  | 0 |
| OTU<br>_73  | Bacteria; Firmicutes; Bacilli; Lactobacillales;<br>Streptococcaceae; Streptococcus                                 | 0  | 0  | 5 |
| OTU<br>_2   | Bacteria; Firmicutes; Negativicutes;<br>Selenomonadales; Veillonellaceae; Veillonella                              | 2  | 4  | 1 |
| OTU<br>_6   | Bacteria; Firmicutes; Negativicutes;<br>Selenomonadales; Veillonellaceae; Veillonella                              | 7  | 1  | 0 |
| OTU<br>_86  | Bacteria; Firmicutes; Negativicutes;<br>Selenomonadales; Veillonellaceae; Veillonella                              | 14 | 0  | 1 |
| OTU<br>_194 | Bacteria; Bacteroidetes; Bacteroidia;<br>Bacteroidales; Prevotellaceae; Prevotella                                 | 0  | 0  | 0 |
| OTU<br>_475 | Bacteria; Firmicutes; Clostridia; Clostridiales;<br>Peptostreptococcaceae;<br>Peptostreptococcaceae_incertae_sedis | 0  | 39 | 0 |
| OTU<br>_56  | Bacteria; Firmicutes; Bacilli; Lactobacillales;<br>Streptococcaceae; Streptococcus                                 | 4  | 3  | 1 |
| OTU<br>_27  | Bacteria; Firmicutes; Negativicutes;<br>Selenomonadales; Veillonellaceae; Veillonella                              | 2  | 0  | 0 |
| OTU<br>_75  | Bacteria; Proteobacteria;<br>Gammaproteobacteria; Pasteurellales;<br>Pasteurellaceae; Haemophilus                  | 0  | 14 | 0 |
| OTU<br>_11  | Bacteria; Fusobacteria; Fusobacteria;<br>Fusobacteriales; Fusobacteriaceae;<br>Fusobacterium                       | 1  | 1  | 0 |
| OTU<br>_266 | Bacteria; Firmicutes; Clostridia; Clostridiales;<br>Lachnospiraceae                                                | 0  | 0  | 3 |
| OTU<br>_162 | Bacteria; Firmicutes; Clostridia; Clostridiales;<br>Lachnospiraceae; Oribacterium                                  | 0  | 0  | 0 |
| OTU<br>_93  | Bacteria; Firmicutes; Bacilli; Lactobacillales;<br>Streptococcaceae; Streptococcus                                 | 1  | 0  | 0 |
| OTU<br>_80  | Bacteria; Firmicutes; Clostridia; Clostridiales;<br>Lachnospiraceae; Oribacterium                                  | 0  | 2  | 0 |
| OTU<br>_341 | Bacteria; Firmicutes; Negativicutes;<br>Selenomonadales; Veillonellaceae; Dialister                                | 0  | 8  | 0 |
| OTU<br>_74  | Bacteria; Firmicutes; Negativicutes;<br>Selenomonadales; Veillonellaceae;<br>Selenomonas                           | 0  | 0  | 0 |
| OTU<br>_211 | Bacteria; Firmicutes; Clostridia; Clostridiales                                                                    | 2  | 6  | 0 |
| OTU<br>_254 | Bacteria; Actinobacteria; Actinobacteria;<br>Actinomycetales; Actinomycetaceae;                                    | 3  | 4  | 0 |

|             |                                                                                                   |   |   |   |
|-------------|---------------------------------------------------------------------------------------------------|---|---|---|
|             | Mobiluncus                                                                                        |   |   |   |
| OTU<br>_5   | Bacteria; Bacteroidetes; Bacteroidia;<br>Bacteroidales; Prevotellaceae; Prevotella                | 5 | 5 | 0 |
| OTU<br>_12  | Bacteria; Fusobacteria; Fusobacteria;<br>Fusobacteriales; Fusobacteriaceae;<br>Fusobacterium      | 4 | 3 | 0 |
| OTU<br>_1   | Bacteria; Firmicutes; Negativicutes;<br>Selenomonadales; Veillonellaceae; Veillonella             | 0 | 0 | 0 |
| OTU<br>_87  | Bacteria; Bacteroidetes; Bacteroidia;<br>Bacteroidales; Prevotellaceae; Prevotella                | 0 | 0 | 0 |
| OTU<br>_58  | Bacteria; Firmicutes; Bacilli; Lactobacillales;<br>Streptococcaceae; Streptococcus                | 0 | 0 | 0 |
| OTU<br>_252 | Bacteria; Firmicutes; Clostridia; Clostridiales                                                   | 0 | 0 | 0 |
| OTU<br>_223 | Bacteria; Actinobacteria; Actinobacteria;<br>Actinomycetales; Actinomycetaceae;<br>Actinomyces    | 1 | 0 | 0 |
| OTU<br>_156 | Bacteria; Bacteroidetes; Flavobacteria;<br>Flavobacteriales; Flavobacteriaceae;<br>Capnocytophaga | 0 | 0 | 0 |
| OTU<br>_188 | Bacteria; Firmicutes; Negativicutes;<br>Selenomonadales; Veillonellaceae;<br>Anaeroglobus         | 0 | 0 | 0 |
| OTU<br>_4   | Bacteria; Fusobacteria; Fusobacteria;<br>Fusobacteriales; Fusobacteriaceae;<br>Fusobacterium      | 2 | 2 | 0 |
| OTU<br>_32  | Bacteria; Firmicutes; Bacilli; Lactobacillales;<br>Streptococcaceae; Streptococcus                | 0 | 0 | 0 |
| OTU<br>_94  | Bacteria; Firmicutes; Clostridia; Clostridiales;<br>Clostridiales_Incertae_Sedis_XI; Parvimonas   | 0 | 1 | 0 |
| OTU<br>_131 | Bacteria; Bacteroidetes; Bacteroidia;<br>Bacteroidales; Prevotellaceae; Prevotella                | 6 | 2 | 0 |
| OTU<br>_147 | Bacteria; Bacteroidetes; Bacteroidia;<br>Bacteroidales; Porphyromonadaceae;<br>Tannerella         | 0 | 0 | 0 |
| OTU<br>_82  | Bacteria; Proteobacteria;<br>Gammaproteobacteria; Pasteurellales;<br>Pasteurellaceae; Haemophilus | 0 | 1 | 2 |
| OTU<br>_24  | Bacteria; Firmicutes; Negativicutes;<br>Selenomonadales; Veillonellaceae                          | 3 | 0 | 0 |
| OTU<br>_145 | Bacteria; Firmicutes; Negativicutes;<br>Selenomonadales; Veillonellaceae; Veillonella             | 0 | 0 | 1 |
| OTU<br>_26  | Bacteria; Firmicutes; Negativicutes;<br>Selenomonadales; Veillonellaceae; Veillonella             | 1 | 3 | 0 |
| OTU<br>_352 | Bacteria; Firmicutes; Bacilli; Bacillales;<br>Staphylococcaceae; Staphylococcus                   | 0 | 0 | 0 |
| OTU         | Bacteria; Firmicutes; Bacilli; Lactobacillales;                                                   | 0 | 1 | 0 |

|             |                                                                                                   |   |   |   |
|-------------|---------------------------------------------------------------------------------------------------|---|---|---|
| _18         | Streptococcaceae; Streptococcus                                                                   |   |   |   |
| OTU<br>_247 | Bacteria; Bacteroidetes; Bacteroidia;<br>Bacteroidales; Prevotellaceae; Prevotella                | 5 | 1 | 0 |
| OTU<br>_164 | Bacteria; Actinobacteria; Actinobacteria;<br>Actinomycetales; Actinomycetaceae;<br>Actinomyces    | 0 | 3 | 0 |
| OTU<br>_176 | Bacteria; Firmicutes; Clostridia; Clostridiales;<br>Peptostreptococcaceae; Peptostreptococcus     | 3 | 1 | 0 |
| OTU<br>_333 | Bacteria; Firmicutes; Bacilli; Lactobacillales;<br>Streptococcaceae; Streptococcus                | 0 | 0 | 0 |
| OTU<br>_40  | Bacteria; Bacteroidetes; Bacteroidia;<br>Bacteroidales; Prevotellaceae; Prevotella                | 1 | 0 | 0 |
| OTU<br>_41  | Bacteria; Firmicutes; Bacilli; Lactobacillales;<br>Streptococcaceae; Streptococcus                | 0 | 0 | 0 |
| OTU<br>_46  | Bacteria; Firmicutes; Clostridia; Clostridiales;<br>Peptostreptococcaceae; Peptostreptococcus     | 1 | 1 | 0 |
| OTU<br>_81  | Bacteria; Fusobacteria; Fusobacteria;<br>Fusobacteriales; Leptotrichiaceae; Leptotrichia          | 0 | 0 | 0 |
| OTU<br>_50  | Bacteria; Firmicutes; Negativicutes;<br>Selenomonadales; Veillonellaceae; Veillonella             | 0 | 0 | 1 |
| OTU<br>_25  | Bacteria; Fusobacteria; Fusobacteria;<br>Fusobacteriales; Fusobacteriaceae;<br>Fusobacterium      | 1 | 3 | 0 |
| OTU<br>_48  | Bacteria; Bacteroidetes; Bacteroidia;<br>Bacteroidales; Prevotellaceae; Prevotella                | 0 | 0 | 0 |
| OTU<br>_134 | Bacteria; Firmicutes; Negativicutes;<br>Selenomonadales; Veillonellaceae;<br>Megasphaera          | 0 | 0 | 0 |
| OTU<br>_279 | Bacteria; Firmicutes; Bacilli; Lactobacillales;<br>Streptococcaceae; Streptococcus                | 0 | 0 | 0 |
| OTU<br>_425 | Bacteria; Firmicutes; Bacilli; Bacillales;<br>Bacillales_Incertae_Sedis_XI; Gemella               | 0 | 0 | 0 |
| OTU<br>_66  | Bacteria; Proteobacteria;<br>Gammaproteobacteria; Pasteurellales;<br>Pasteurellaceae; Haemophilus | 0 | 0 | 1 |
| OTU<br>_60  | Bacteria; Firmicutes; Negativicutes;<br>Selenomonadales; Veillonellaceae; Veillonella             | 2 | 0 | 0 |
| OTU<br>_249 | Bacteria; Actinobacteria; Actinobacteria;<br>Actinomycetales; Actinomycetaceae;<br>Actinomyces    | 0 | 0 | 0 |
| OTU<br>_257 | Bacteria; Proteobacteria;<br>Gammaproteobacteria; Pasteurellales;<br>Pasteurellaceae; Haemophilus | 1 | 0 | 0 |
| OTU<br>_130 | Bacteria; Firmicutes; Negativicutes;<br>Selenomonadales; Veillonellaceae; Veillonella             | 2 | 0 | 0 |
| OTU<br>_210 | Bacteria; Firmicutes; Bacilli; Lactobacillales;<br>Streptococcaceae; Streptococcus                | 0 | 0 | 1 |

|             |                                                                                                   |   |    |   |
|-------------|---------------------------------------------------------------------------------------------------|---|----|---|
| OTU<br>_7   | Bacteria; Firmicutes; Negativicutes;<br>Selenomonadales; Veillonellaceae; Veillonella             | 1 | 1  | 0 |
| OTU<br>_208 | Bacteria; Firmicutes; Bacilli; Lactobacillales;<br>Streptococcaceae; Streptococcus                | 0 | 0  | 2 |
| OTU<br>_39  | Bacteria; Fusobacteria; Fusobacteria;<br>Fusobacteriales; Fusobacteriaceae;<br>Fusobacterium      | 0 | 1  | 0 |
| OTU<br>_108 | Bacteria; Proteobacteria;<br>Gammaproteobacteria; Pasteurellales;<br>Pasteurellaceae; Haemophilus | 0 | 1  | 0 |
| OTU<br>_110 | Bacteria; Firmicutes; Bacilli; Lactobacillales;<br>Streptococcaceae; Streptococcus                | 1 | 2  | 0 |
| OTU<br>_49  | Bacteria; Firmicutes; Negativicutes;<br>Selenomonadales; Veillonellaceae; Veillonella             | 1 | 1  | 0 |
| OTU<br>_92  | Bacteria; Firmicutes; Negativicutes;<br>Selenomonadales; Veillonellaceae; Veillonella             | 0 | 1  | 0 |
| OTU<br>_281 | Bacteria; Actinobacteria; Actinobacteria;<br>Coriobacteriales; Coriobacteriaceae; Slackia         | 0 | 0  | 0 |
| OTU<br>_214 | Bacteria; Firmicutes; Bacilli; Lactobacillales;<br>Carnobacteriaceae; Granulicatella              | 0 | 0  | 1 |
| OTU<br>_116 | Bacteria; Firmicutes; Clostridia; Clostridiales;<br>Peptostreptococcaceae; Peptostreptococcus     | 1 | 1  | 0 |
| OTU<br>_13  | Bacteria; Firmicutes; Bacilli; Lactobacillales;<br>Streptococcaceae; Streptococcus                | 0 | 0  | 0 |
| OTU<br>_33  | Bacteria; Bacteroidetes; Bacteroidia;<br>Bacteroidales; Prevotellaceae; Prevotella                | 0 | 0  | 0 |
| OTU<br>_61  | Bacteria; Firmicutes; Negativicutes;<br>Selenomonadales; Veillonellaceae; Veillonella             | 0 | 2  | 0 |
| OTU<br>_16  | Bacteria; Firmicutes; Bacilli; Lactobacillales;<br>Streptococcaceae; Streptococcus                | 0 | 0  | 1 |
| OTU<br>_298 | Bacteria; Firmicutes; Clostridia; Clostridiales;<br>Lachnospiraceae                               | 0 | 15 | 0 |
| OTU<br>_311 | Bacteria; Firmicutes; Negativicutes;<br>Selenomonadales; Veillonellaceae; Veillonella             | 0 | 0  | 0 |
| OTU<br>_42  | Bacteria; Firmicutes; Negativicutes;<br>Selenomonadales; Veillonellaceae; Veillonella             | 0 | 0  | 0 |
| OTU<br>_83  | Bacteria; Firmicutes; Clostridia; Clostridiales;<br>Peptostreptococcaceae; Peptostreptococcus     | 0 | 0  | 0 |
| OTU<br>_124 | Bacteria; Bacteroidetes; Bacteroidia;<br>Bacteroidales; Prevotellaceae; Prevotella                | 0 | 0  | 0 |
| OTU<br>_271 | Bacteria; Firmicutes; Negativicutes;<br>Selenomonadales; Veillonellaceae;<br>Anaeroglobus         | 0 | 0  | 0 |
| OTU<br>_136 | Bacteria; Firmicutes; Negativicutes;<br>Selenomonadales; Veillonellaceae; Veillonella             | 0 | 0  | 0 |
| OTU<br>_31  | Bacteria; Firmicutes; Clostridia; Clostridiales;<br>Clostridiales_Incertae_Sedis_XI; Parvimonas   | 1 | 1  | 0 |



|             |                                                                                                   |   |   |   |
|-------------|---------------------------------------------------------------------------------------------------|---|---|---|
| OTU<br>_103 | Bacteria; Firmicutes; Bacilli; Lactobacillales;<br>Streptococcaceae; Streptococcus                | 0 | 1 | 0 |
| OTU<br>_135 | Bacteria; Firmicutes; Negativicutes;<br>Selenomonadales; Veillonellaceae; Veillonella             | 0 | 0 | 0 |
| OTU<br>_222 | Bacteria; Fusobacteria; Fusobacteria;<br>Fusobacteriales; Leptotrichiaceae; Leptotrichia          | 0 | 1 | 0 |
| OTU<br>_64  | Bacteria; Firmicutes; Negativicutes;<br>Selenomonadales; Veillonellaceae                          | 2 | 0 | 0 |
| OTU<br>_177 | Bacteria; Fusobacteria; Fusobacteria;<br>Fusobacteriales; Leptotrichiaceae; Leptotrichia          | 0 | 1 | 0 |
| OTU<br>_30  | Bacteria; Fusobacteria; Fusobacteria;<br>Fusobacteriales; Fusobacteriaceae;<br>Fusobacterium      | 0 | 1 | 0 |
| OTU<br>_52  | Bacteria; Firmicutes; Negativicutes;<br>Selenomonadales; Veillonellaceae; Veillonella             | 1 | 0 | 0 |
| OTU<br>_418 | Bacteria; Bacteroidetes; Flavobacteria;<br>Flavobacteriales; Flavobacteriaceae;<br>Capnocytophaga | 0 | 0 | 0 |
| OTU<br>_62  | Bacteria; Firmicutes; Bacilli; Lactobacillales;<br>Streptococcaceae; Streptococcus                | 0 | 0 | 0 |
| OTU<br>_129 | Bacteria; Firmicutes; Bacilli; Lactobacillales;<br>Streptococcaceae; Streptococcus                | 1 | 0 | 0 |
| OTU<br>_441 | Bacteria; Bacteroidetes; Flavobacteria;<br>Flavobacteriales; Flavobacteriaceae;<br>Planobacterium | 0 | 1 | 0 |
| OTU<br>_405 | Bacteria; Actinobacteria; Actinobacteria;<br>Actinomycetales; Actinomycetaceae;<br>Actinomyces    | 0 | 0 | 0 |
| OTU<br>_121 | Bacteria; Firmicutes; Bacilli; Lactobacillales;<br>Streptococcaceae; Streptococcus                | 0 | 0 | 0 |
| OTU<br>_217 | Bacteria; Bacteroidetes; Flavobacteria;<br>Flavobacteriales; Flavobacteriaceae;<br>Capnocytophaga | 0 | 0 | 0 |
| OTU<br>_175 | Bacteria; Firmicutes; Bacilli; Lactobacillales;<br>Streptococcaceae; Streptococcus                | 0 | 0 | 0 |
| OTU<br>_149 | Bacteria; Firmicutes; Bacilli; Lactobacillales;<br>Streptococcaceae; Streptococcus                | 1 | 1 | 0 |
| OTU<br>_292 | Bacteria; Firmicutes; Bacilli; Lactobacillales;<br>Streptococcaceae; Streptococcus                | 0 | 0 | 0 |
| OTU<br>_91  | Bacteria; Firmicutes; Negativicutes;<br>Selenomonadales; Veillonellaceae; Veillonella             | 0 | 0 | 0 |
| OTU<br>_112 | Bacteria; Firmicutes; Bacilli; Lactobacillales;<br>Streptococcaceae; Streptococcus                | 0 | 0 | 0 |
| OTU<br>_349 | Bacteria; Tenericutes; Mollicutes;<br>Mycoplasmatales; Mycoplasmataceae;<br>Mycoplasma            | 0 | 0 | 0 |
| OTU         | Bacteria; Bacteroidetes; Bacteroidia;                                                             | 1 | 0 | 0 |

|             |                                                                                                                                 |   |   |   |
|-------------|---------------------------------------------------------------------------------------------------------------------------------|---|---|---|
| _118        | Bacteroidales; Prevotellaceae; Prevotella                                                                                       |   |   |   |
| OTU<br>_37  | Bacteria; Bacteroidetes; Bacteroidia;<br>Bacteroidales; Porphyromonadaceae;<br>Porphyromonas                                    | 0 | 0 | 0 |
| OTU<br>_313 | Bacteria; SR1; SR1_class_incertae_sedis;<br>SR1_order_incertae_sedis;<br>SR1_family_incertae_sedis;<br>SR1_genus_incertae_sedis | 0 | 0 | 0 |
| OTU<br>_89  | Bacteria; Firmicutes; Bacilli; Lactobacillales;<br>Streptococcaceae; Streptococcus                                              | 0 | 0 | 0 |
| OTU<br>_152 | Bacteria; Fusobacteria; Fusobacteria;<br>Fusobacteriales; Fusobacteriaceae;<br>Fusobacterium                                    | 1 | 0 | 1 |
| OTU<br>_460 | Bacteria; Proteobacteria; Alphaproteobacteria;<br>Rhizobiales; Bradyrhizobiaceae; Bradyrhizobium                                | 0 | 0 | 0 |
| OTU<br>_335 | Bacteria; Fusobacteria; Fusobacteria;<br>Fusobacteriales; Leptotrichiaceae; Leptotrichia                                        | 0 | 0 | 0 |
| OTU<br>_59  | Bacteria; Bacteroidetes; Bacteroidia;<br>Bacteroidales; Prevotellaceae; Prevotella                                              | 1 | 0 | 0 |
| OTU<br>_138 | Bacteria; Bacteroidetes; Bacteroidia;<br>Bacteroidales; Prevotellaceae; Prevotella                                              | 0 | 0 | 0 |
| OTU<br>_79  | Bacteria; Firmicutes; Negativicutes;<br>Selenomonadales; Veillonellaceae;<br>Megasphaera                                        | 5 | 0 | 0 |
| OTU<br>_122 | Bacteria; Firmicutes; Negativicutes;<br>Selenomonadales; Veillonellaceae; Veillonella                                           | 1 | 0 | 0 |
| OTU<br>_212 | Bacteria; Firmicutes; Bacilli; Lactobacillales;<br>Streptococcaceae; Streptococcus                                              | 0 | 0 | 0 |
| OTU<br>_195 | Bacteria; Firmicutes; Bacilli; Lactobacillales;<br>Streptococcaceae; Streptococcus                                              | 0 | 0 | 0 |
| OTU<br>_219 | Bacteria; Firmicutes; Bacilli; Lactobacillales;<br>Streptococcaceae; Streptococcus                                              | 0 | 0 | 0 |
| OTU<br>_99  | Bacteria; Firmicutes; Bacilli; Lactobacillales;<br>Streptococcaceae; Streptococcus                                              | 0 | 0 | 0 |
| OTU<br>_296 | Bacteria; Actinobacteria; Actinobacteria;<br>Actinomycetales; Actinomycetaceae;<br>Actinomyces                                  | 0 | 0 | 0 |
| OTU<br>_144 | Bacteria; Firmicutes; Erysipelotrichia;<br>Erysipelotrichales; Erysipelotrichaceae;<br>Solobacterium                            | 0 | 1 | 0 |
| OTU<br>_69  | Bacteria; Firmicutes; Negativicutes;<br>Selenomonadales; Veillonellaceae; Veillonella                                           | 1 | 1 | 0 |
| OTU<br>_334 | Bacteria; Bacteroidetes; Flavobacteria;<br>Flavobacteriales; Flavobacteriaceae;<br>Capnocytophaga                               | 0 | 0 | 0 |
| OTU<br>_88  | Bacteria; Firmicutes; Negativicutes;<br>Selenomonadales; Veillonellaceae; Veillonella                                           | 0 | 0 | 0 |

|             |                                                                                                      |   |   |   |
|-------------|------------------------------------------------------------------------------------------------------|---|---|---|
| OTU<br>_44  | Bacteria; Firmicutes; Clostridia; Clostridiales;<br>Clostridiales_Incertae_Sedis_XI; Parvimonas      | 0 | 2 | 0 |
| OTU<br>_174 | Bacteria; Bacteroidetes; Bacteroidia;<br>Bacteroidales; Porphyromonadaceae;<br>Porphyromonas         | 0 | 0 | 0 |
| OTU<br>_101 | Bacteria; Firmicutes; Bacilli; Lactobacillales;<br>Streptococcaceae; Streptococcus                   | 0 | 0 | 0 |
| OTU<br>_171 | Bacteria; Firmicutes; Negativicutes;<br>Selenomonadales; Veillonellaceae; Veillonella                | 0 | 0 | 0 |
| OTU<br>_102 | Bacteria; Firmicutes; Erysipelotrichia;<br>Erysipelotrichales; Erysipelotrichaceae;<br>Solobacterium | 0 | 0 | 0 |
| OTU<br>_117 | Bacteria; Firmicutes; Clostridia; Clostridiales;<br>Lachnospiraceae; Oribacterium                    | 0 | 0 | 0 |
| OTU<br>_107 | Bacteria; Firmicutes; Negativicutes;<br>Selenomonadales; Veillonellaceae; Veillonella                | 0 | 0 | 0 |
| OTU<br>_294 | Bacteria; Actinobacteria; Actinobacteria;<br>Coriobacteriales; Coriobacteriaceae; Olsenella          | 0 | 0 | 0 |
| OTU<br>_95  | Bacteria; Fusobacteria; Fusobacteria;<br>Fusobacteriales; Fusobacteriaceae;<br>Fusobacterium         | 0 | 0 | 0 |
| OTU<br>_51  | Bacteria; Firmicutes; Negativicutes;<br>Selenomonadales; Veillonellaceae; Veillonella                | 1 | 0 | 0 |
| OTU<br>_170 | Bacteria; Bacteroidetes; Bacteroidia;<br>Bacteroidales; Prevotellaceae; Prevotella                   | 0 | 0 | 0 |
| OTU<br>_356 | Bacteria; Firmicutes; Bacilli; Lactobacillales;<br>Aerococcaceae; Abiotrophia                        | 0 | 1 | 0 |
| OTU<br>_45  | Bacteria; Bacteroidetes; Bacteroidia;<br>Bacteroidales; Prevotellaceae; Prevotella                   | 0 | 0 | 0 |
| OTU<br>_310 | Bacteria; Firmicutes; Erysipelotrichia;<br>Erysipelotrichales; Erysipelotrichaceae;<br>Solobacterium | 1 | 0 | 0 |
| OTU<br>_98  | Bacteria; Firmicutes; Negativicutes;<br>Selenomonadales; Veillonellaceae; Veillonella                | 0 | 0 | 0 |
| OTU<br>_68  | Bacteria; Firmicutes; Negativicutes;<br>Selenomonadales; Veillonellaceae; Veillonella                | 0 | 0 | 0 |
| OTU<br>_104 | Bacteria; Firmicutes; Bacilli; Lactobacillales;<br>Streptococcaceae; Streptococcus                   | 1 | 0 | 0 |
| OTU<br>_161 | Bacteria; Firmicutes; Negativicutes;<br>Selenomonadales; Veillonellaceae; Veillonella                | 0 | 1 | 0 |
| OTU<br>_71  | Bacteria; Firmicutes; Bacilli; Lactobacillales;<br>Streptococcaceae; Streptococcus                   | 0 | 1 | 0 |
| OTU<br>_264 | Bacteria; Firmicutes; Bacilli; Lactobacillales;<br>Carnobacteriaceae                                 | 1 | 0 | 0 |
| OTU<br>_227 | Bacteria; Firmicutes; Negativicutes;<br>Selenomonadales; Veillonellaceae; Veillonella                | 0 | 0 | 0 |
| OTU         | Bacteria; Fusobacteria; Fusobacteria;                                                                | 0 | 0 | 0 |

|             |                                                                                                              |   |   |   |
|-------------|--------------------------------------------------------------------------------------------------------------|---|---|---|
| _114        | Fusobacteriales; Fusobacteriaceae;<br>Fusobacterium                                                          |   |   |   |
| OTU<br>_38  | Bacteria; Fusobacteria; Fusobacteria;<br>Fusobacteriales; Fusobacteriaceae;<br>Fusobacterium                 | 0 | 0 | 0 |
| OTU<br>_76  | Bacteria; Firmicutes; Clostridia; Clostridiales;<br>Lachnospiraceae; Oribacterium                            | 0 | 0 | 0 |
| OTU<br>_113 | Bacteria; Firmicutes; Bacilli; Lactobacillales;<br>Streptococcaceae; Streptococcus                           | 0 | 1 | 0 |
| OTU<br>_55  | Bacteria; Bacteroidetes; Bacteroidia;<br>Bacteroidales; Prevotellaceae; Prevotella                           | 0 | 0 | 0 |
| OTU<br>_120 | Bacteria; Firmicutes; Negativicutes;<br>Selenomonadales; Veillonellaceae; Veillonella                        | 0 | 0 | 0 |
| OTU<br>_36  | Bacteria; Firmicutes; Clostridia; Clostridiales;<br>Clostridiales_Incertae_Sedis_XI; Parvimonas              | 0 | 0 | 0 |
| OTU<br>_329 | Bacteria; Firmicutes; Clostridia; Clostridiales;<br>Peptostreptococcaceae; Peptostreptococcus                | 0 | 0 | 0 |
| OTU<br>_483 | Bacteria; Firmicutes; Clostridia; Clostridiales;<br>Lachnospiraceae; Butyrivibrio                            | 0 | 0 | 0 |
| OTU<br>_100 | Bacteria; Proteobacteria;<br>Epsilonproteobacteria; Campylobacteriales;<br>Campylobacteraceae; Campylobacter | 1 | 0 | 0 |
| OTU<br>_301 | Bacteria; Proteobacteria;<br>Gammaproteobacteria; Pasteurellales;<br>Pasteurellaceae                         | 0 | 1 | 0 |
| OTU<br>_191 | Bacteria; Proteobacteria; Betaproteobacteria;<br>Neisseriales; Neisseriaceae; Eikenella                      | 0 | 1 | 0 |
| OTU<br>_297 | Bacteria; Firmicutes; Bacilli; Lactobacillales;<br>Streptococcaceae; Streptococcus                           | 0 | 0 | 0 |
| OTU<br>_105 | Bacteria; Firmicutes; Negativicutes;<br>Selenomonadales; Veillonellaceae                                     | 0 | 0 | 0 |
| OTU<br>_172 | Bacteria; Firmicutes; Bacilli; Lactobacillales                                                               | 0 | 0 | 0 |
| OTU<br>_123 | Bacteria; Firmicutes; Negativicutes;<br>Selenomonadales; Veillonellaceae                                     | 0 | 0 | 0 |
| OTU<br>_157 | Bacteria; Firmicutes; Bacilli; Lactobacillales                                                               | 0 | 0 | 0 |
| OTU<br>_96  | Bacteria; Firmicutes; Bacilli; Lactobacillales;<br>Streptococcaceae; Streptococcus                           | 0 | 0 | 0 |
| OTU<br>_160 | Bacteria; Firmicutes; Bacilli; Lactobacillales;<br>Streptococcaceae; Streptococcus                           | 0 | 0 | 0 |
| OTU<br>_109 | Bacteria; Firmicutes; Negativicutes;<br>Selenomonadales; Veillonellaceae; Veillonella                        | 0 | 0 | 0 |
| OTU<br>_206 | Bacteria; Firmicutes; Clostridia; Clostridiales;<br>Clostridiales_Incertae_Sedis_XI; Parvimonas              | 0 | 1 | 0 |
| OTU<br>_382 | Bacteria; Firmicutes; Clostridia; Clostridiales;<br>Peptococcaceae_1; Peptococcus                            | 0 | 2 | 0 |

|             |                                                                                                             |   |   |   |
|-------------|-------------------------------------------------------------------------------------------------------------|---|---|---|
| OTU<br>_127 | Bacteria; Firmicutes; Erysipelotrichia;<br>Erysipelotrichales; Erysipelotrichaceae;<br>Solobacterium        | 0 | 1 | 0 |
| OTU<br>_173 | Bacteria; Firmicutes; Negativicutes;<br>Selenomonadales; Veillonellaceae; Veillonella                       | 1 | 0 | 0 |
| OTU<br>_193 | Bacteria; Firmicutes; Clostridia; Clostridiales;<br>Lachnospiraceae; Oribacterium                           | 0 | 0 | 0 |
| OTU<br>_250 | Bacteria; Proteobacteria;<br>Epsilonproteobacteria; Campylobacterales;<br>Campylobacteraceae; Campylobacter | 0 | 0 | 0 |
| OTU<br>_209 | Bacteria; Firmicutes; Negativicutes;<br>Selenomonadales; Veillonellaceae; Veillonella                       | 0 | 0 | 0 |
| OTU<br>_221 | Bacteria; Firmicutes; Clostridia; Clostridiales;<br>Lachnospiraceae; Catonella                              | 0 | 0 | 0 |
| OTU<br>_154 | Bacteria; Firmicutes; Bacilli; Lactobacillales;<br>Streptococcaceae; Streptococcus                          | 0 | 0 | 0 |
| OTU<br>_153 | Bacteria; Proteobacteria;<br>Epsilonproteobacteria; Campylobacterales;<br>Campylobacteraceae; Campylobacter | 0 | 0 | 0 |
| OTU<br>_320 | Bacteria; Firmicutes; Negativicutes;<br>Selenomonadales; Veillonellaceae;<br>Megasphaera                    | 0 | 0 | 0 |
| OTU<br>_168 | Bacteria; Firmicutes; Clostridia; Clostridiales;<br>Lachnospiraceae; Oribacterium                           | 2 | 0 | 0 |
| OTU<br>_150 | Bacteria; Firmicutes; Clostridia; Clostridiales;<br>Clostridiales_Incertae_Sedis_XI; Parvimonas             | 0 | 0 | 0 |
| OTU<br>_143 | Bacteria; Proteobacteria;<br>Epsilonproteobacteria; Campylobacterales;<br>Campylobacteraceae; Campylobacter | 1 | 0 | 0 |
| OTU<br>_148 | Bacteria; Proteobacteria;<br>Epsilonproteobacteria; Campylobacterales;<br>Campylobacteraceae; Campylobacter | 0 | 0 | 0 |
| OTU<br>_183 | Bacteria; Firmicutes; Negativicutes;<br>Selenomonadales; Veillonellaceae; Veillonella                       | 0 | 0 | 0 |
| OTU<br>_140 | Bacteria; Proteobacteria;<br>Gammaproteobacteria; Pasteurellales;<br>Pasteurellaceae; Mannheimia            | 2 | 0 | 0 |
| OTU<br>_78  | Bacteria; Bacteroidetes; Bacteroidia;<br>Bacteroidales; Prevotellaceae; Prevotella                          | 0 | 1 | 0 |
| OTU<br>_215 | Bacteria; Firmicutes; Clostridia; Clostridiales;<br>Lachnospiraceae; Oribacterium                           | 1 | 1 | 0 |
| OTU<br>_289 | Bacteria; Firmicutes; Clostridia; Clostridiales;<br>Clostridiales_Incertae_Sedis_XI; Parvimonas             | 0 | 0 | 0 |
| OTU<br>_179 | Bacteria; Firmicutes; Bacilli; Bacillales;<br>Bacillales_Incertae_Sedis_XI; Gemella                         | 0 | 0 | 0 |
| OTU<br>_317 | Bacteria; Proteobacteria;<br>Gammaproteobacteria; Pasteurellales;                                           | 0 | 0 | 0 |

|             |                                                                                                       |   |   |   |
|-------------|-------------------------------------------------------------------------------------------------------|---|---|---|
|             | Pasteurellaceae; Mannheimia                                                                           |   |   |   |
| OTU<br>_111 | Bacteria; Firmicutes; Negativicutes;<br>Selenomonadales; Veillonellaceae                              | 0 | 0 | 0 |
| OTU<br>_285 | Bacteria; Firmicutes; Negativicutes;<br>Selenomonadales; Veillonellaceae                              | 1 | 0 | 0 |
| OTU<br>_327 | Bacteria; Proteobacteria;<br>Gammaproteobacteria; Enterobacteriales;<br>Enterobacteriaceae; Yersinia  | 1 | 0 | 0 |
| OTU<br>_231 | Bacteria; Firmicutes; Bacilli; Lactobacillales;<br>Streptococcaceae; Streptococcus                    | 0 | 0 | 0 |
| OTU<br>_220 | Bacteria; Firmicutes; Negativicutes;<br>Selenomonadales; Veillonellaceae; Veillonella                 | 0 | 0 | 0 |
| OTU<br>_236 | Bacteria; Fusobacteria; Fusobacteria;<br>Fusobacteriales; Leptotrichiaceae; Leptotrichia              | 0 | 0 | 0 |
| OTU<br>_302 | Bacteria; Proteobacteria;<br>Gammaproteobacteria; Pasteurellales;<br>Pasteurellaceae; Mannheimia      | 0 | 0 | 0 |
| OTU<br>_467 | Bacteria; Proteobacteria; Alphaproteobacteria;<br>Rhizobiales; Phyllobacteriaceae;<br>Phyllobacterium | 0 | 0 | 1 |
| OTU<br>_196 | Bacteria; Firmicutes; Clostridia; Clostridiales;<br>Lachnospiraceae; Catonella                        | 0 | 0 | 0 |
| OTU<br>_345 | Bacteria; Firmicutes; Bacilli; Lactobacillales                                                        | 0 | 0 | 0 |
| OTU<br>_230 | Bacteria; Bacteroidetes; Bacteroidia;<br>Bacteroidales; Porphyromonadaceae;<br>Porphyromonas          | 0 | 0 | 0 |
| OTU<br>_269 | Bacteria; Fusobacteria; Fusobacteria;<br>Fusobacteriales; Fusobacteriaceae;<br>Fusobacterium          | 0 | 1 | 0 |
| OTU<br>_312 | Bacteria; Firmicutes; Bacilli; Lactobacillales;<br>Streptococcaceae; Streptococcus                    | 0 | 0 | 0 |
| OTU<br>_417 | Bacteria; Firmicutes; Negativicutes;<br>Selenomonadales; Veillonellaceae; Dialister                   | 0 | 0 | 0 |
| OTU<br>_213 | Bacteria; Firmicutes; Negativicutes;<br>Selenomonadales; Veillonellaceae; Veillonella                 | 3 | 0 | 0 |
| OTU<br>_234 | Bacteria; Firmicutes; Negativicutes;<br>Selenomonadales; Veillonellaceae                              | 0 | 0 | 0 |
| OTU<br>_218 | Bacteria; Actinobacteria; Actinobacteria;<br>Coriobacteriales; Coriobacteriaceae; Atopobium           | 0 | 0 | 0 |
| OTU<br>_242 | Bacteria; Firmicutes; Negativicutes;<br>Selenomonadales; Veillonellaceae; Veillonella                 | 0 | 0 | 0 |
| OTU<br>_225 | Bacteria; Fusobacteria; Fusobacteria;<br>Fusobacteriales; Leptotrichiaceae; Leptotrichia              | 0 | 0 | 0 |
| OTU<br>_275 | Bacteria; Bacteroidetes; Bacteroidia;<br>Bacteroidales; Prevotellaceae; Prevotella                    | 0 | 0 | 0 |
| OTU         | Bacteria; Firmicutes; Bacilli; Lactobacillales;                                                       | 0 | 0 | 0 |

|             |                                                                                                              |   |   |   |
|-------------|--------------------------------------------------------------------------------------------------------------|---|---|---|
| _336        | Streptococcaceae; Streptococcus                                                                              |   |   |   |
| OTU<br>_344 | Bacteria; Firmicutes; Negativicutes;<br>Selenomonadales; Veillonellaceae; Veillonella                        | 0 | 1 | 0 |
| OTU<br>_319 | Bacteria; Firmicutes; Clostridia; Clostridiales;<br>Eubacteriaceae; Eubacterium                              | 0 | 0 | 0 |
| OTU<br>_322 | Bacteria; Firmicutes; Negativicutes;<br>Selenomonadales; Veillonellaceae;<br>Megasphaera                     | 0 | 0 | 0 |
| OTU<br>_229 | Bacteria; Firmicutes; Negativicutes;<br>Selenomonadales; Veillonellaceae; Veillonella                        | 0 | 0 | 0 |
| OTU<br>_204 | Bacteria; Firmicutes; Negativicutes;<br>Selenomonadales; Veillonellaceae;<br>Megasphaera                     | 1 | 0 | 0 |
| OTU<br>_224 | Bacteria; Firmicutes; Negativicutes;<br>Selenomonadales; Veillonellaceae;<br>Megasphaera                     | 1 | 0 | 0 |
| OTU<br>_338 | Bacteria; Bacteroidetes; Bacteroidia;<br>Bacteroidales; Prevotellaceae; Prevotella                           | 0 | 0 | 0 |
| OTU<br>_339 | Bacteria; Bacteroidetes                                                                                      | 0 | 0 | 0 |
| OTU<br>_199 | Bacteria; Firmicutes; Negativicutes;<br>Selenomonadales; Veillonellaceae;<br>Megasphaera                     | 0 | 0 | 0 |
| OTU<br>_325 | Bacteria; Firmicutes; Negativicutes;<br>Selenomonadales; Veillonellaceae; Veillonella                        | 0 | 0 | 0 |
| OTU<br>_324 | Bacteria; Firmicutes; Clostridia; Clostridiales;<br>Clostridiales_Incertae_Sedis_XI; Parvimonas              | 0 | 0 | 0 |
| OTU<br>_192 | Bacteria; Proteobacteria;<br>Gammaproteobacteria; Pasteurellales;<br>Pasteurellaceae;                        | 0 | 0 | 0 |
| OTU<br>_235 | Bacteria; Firmicutes; Negativicutes;<br>Selenomonadales; Veillonellaceae                                     | 0 | 0 | 0 |
| OTU<br>_351 | Bacteria; Firmicutes; Bacilli; Lactobacillales;<br>Streptococcaceae; Streptococcus                           | 0 | 0 | 0 |
| OTU<br>_287 | Bacteria; Firmicutes; Negativicutes;<br>Selenomonadales; Veillonellaceae; Veillonella                        | 0 | 0 | 0 |
| OTU<br>_274 | Bacteria; Firmicutes; Clostridia; Clostridiales;<br>Lachnospiraceae; Catonella                               | 0 | 1 | 0 |
| OTU<br>_272 | Bacteria; Firmicutes; Negativicutes;<br>Selenomonadales; Veillonellaceae;<br>Megasphaera                     | 1 | 0 | 0 |
| OTU<br>_260 | Bacteria; Firmicutes; Negativicutes;<br>Selenomonadales; Veillonellaceae                                     | 0 | 0 | 0 |
| OTU<br>_267 | Bacteria; Proteobacteria;<br>Epsilonproteobacteria; Campylobacteriales;<br>Campylobacteraceae; Campylobacter | 1 | 1 | 0 |
| OTU         | Bacteria; Proteobacteria;                                                                                    | 0 | 0 | 0 |

|             |                                                                                                      |   |   |   |
|-------------|------------------------------------------------------------------------------------------------------|---|---|---|
| _331        | Epsilonproteobacteria; Campylobacterales;<br>Campylobacteraceae; Campylobacter                       |   |   |   |
| OTU<br>_421 | Bacteria; Proteobacteria; Alphaproteobacteria;<br>Rhizobiales                                        | 0 | 0 | 0 |
| OTU<br>_233 | Bacteria; Firmicutes; Negativicutes;<br>Selenomonadales; Veillonellaceae; Veillonella                | 0 | 0 | 0 |
| OTU<br>_316 | Bacteria; Firmicutes; Clostridia; Clostridiales;<br>Lachnospiraceae; Catonella                       | 0 | 0 | 0 |
| OTU<br>_321 | Bacteria; Firmicutes; Erysipelotrichia;<br>Erysipelotrichales; Erysipelotrichaceae;<br>Solobacterium | 0 | 0 | 0 |
| OTU<br>_200 | Bacteria; Firmicutes; Erysipelotrichia;<br>Erysipelotrichales; Erysipelotrichaceae;<br>Solobacterium | 0 | 0 | 0 |
| OTU<br>_270 | Bacteria; Firmicutes; Negativicutes;<br>Selenomonadales; Veillonellaceae; Veillonella                | 0 | 0 | 0 |
| OTU<br>_392 | Bacteria; Firmicutes; Bacilli; Lactobacillales;<br>Lactobacillaceae; Lactobacillus                   | 0 | 0 | 0 |
| OTU<br>_299 | Bacteria; Bacteroidetes; Bacteroidia;<br>Bacteroidales; Prevotellaceae; Prevotella                   | 0 | 0 | 0 |
| OTU<br>_323 | Bacteria; Bacteroidetes; Bacteroidia;<br>Bacteroidales; Prevotellaceae; Prevotella                   | 0 | 0 | 0 |
| OTU<br>_471 | Bacteria; Actinobacteria; Actinobacteria;<br>Bifidobacteriales; Bifidobacteriaceae;<br>Alloscardovia | 0 | 0 | 0 |
| OTU<br>_303 | Bacteria; Firmicutes; Clostridia; Clostridiales;<br>Lachnospiraceae; Oribacterium                    | 0 | 1 | 0 |
| OTU<br>_261 | Bacteria; Firmicutes; Negativicutes;<br>Selenomonadales; Veillonellaceae; Centipeda                  | 0 | 0 | 0 |
| OTU<br>_248 | Bacteria; Bacteroidetes; Bacteroidia;<br>Bacteroidales; Prevotellaceae; Prevotella                   | 0 | 0 | 0 |
| OTU<br>_262 | Bacteria; Firmicutes; Bacilli; Lactobacillales;<br>Streptococcaceae; Streptococcus                   | 0 | 0 | 0 |
| OTU<br>_318 | Bacteria; Firmicutes; Clostridia; Clostridiales;<br>Peptostreptococcaceae; Peptostreptococcus        | 0 | 0 | 0 |
| OTU<br>_265 | Bacteria; Firmicutes; Negativicutes;<br>Selenomonadales; Veillonellaceae; Veillonella                | 0 | 0 | 0 |
| OTU<br>_342 | Bacteria; Proteobacteria;<br>Gammaproteobacteria; Oceanospirillales;<br>Halomonadaceae; Halomonas    | 0 | 0 | 1 |
| OTU<br>_358 | Bacteria; Firmicutes; Bacilli; Lactobacillales;<br>Streptococcaceae; Streptococcus                   | 0 | 0 | 0 |
| OTU<br>_452 | Bacteria; Firmicutes; Bacilli; Lactobacillales;<br>Streptococcaceae; Streptococcus                   | 0 | 0 | 0 |
| OTU<br>_295 | Bacteria; Firmicutes; Clostridia; Clostridiales;<br>Lachnospiraceae; Oribacterium                    | 0 | 0 | 0 |
| OTU         | Bacteria; Actinobacteria; Actinobacteria;                                                            | 0 | 0 | 0 |



|             |                                                                                                                                 |   |   |   |
|-------------|---------------------------------------------------------------------------------------------------------------------------------|---|---|---|
| _378        | Actinomycetales; Micrococcaceae; Micrococcus                                                                                    |   |   |   |
| OTU<br>_380 | Bacteria; Fusobacteria; Fusobacteria;<br>Fusobacteriales; Fusobacteriaceae;<br>Fusobacterium                                    | 1 | 0 | 0 |
| OTU<br>_435 | Bacteria; Firmicutes; Negativicutes;<br>Selenomonadales; Veillonellaceae; Veillonella                                           | 0 | 0 | 0 |
| OTU<br>_291 | Bacteria; Actinobacteria; Actinobacteria;<br>Coriobacteriales; Coriobacteriaceae; Atopobium                                     | 0 | 0 | 0 |
| OTU<br>_453 | Bacteria; Firmicutes; Bacilli; Lactobacillales;<br>Streptococcaceae; Streptococcus                                              | 0 | 0 | 1 |
| OTU<br>_429 | Bacteria; Firmicutes; Negativicutes;<br>Selenomonadales; Veillonellaceae; Veillonella                                           | 0 | 0 | 0 |
| OTU<br>_473 | Bacteria; Proteobacteria;<br>Gammaproteobacteria; Pasteurellales;<br>Pasteurellaceae; Haemophilus                               | 0 | 0 | 0 |
| OTU<br>_394 | Bacteria; Firmicutes; Clostridia; Clostridiales;<br>Lachnospiraceae                                                             | 0 | 0 | 0 |
| OTU<br>_459 | Bacteria; Firmicutes; Negativicutes;<br>Selenomonadales; Veillonellaceae; Veillonella                                           | 0 | 0 | 0 |
| OTU<br>_484 | Bacteria; Firmicutes; Negativicutes;<br>Selenomonadales; Veillonellaceae                                                        | 0 | 0 | 0 |
| OTU<br>_478 | Bacteria; Firmicutes; Clostridia; Clostridiales;<br>Lachnospiraceae                                                             | 0 | 0 | 0 |
| OTU<br>_365 | Bacteria; TM7; TM7_class_incertae_sedis;<br>TM7_order_incertae_sedis;<br>TM7_family_incertae_sedis;<br>TM7_genus_incertae_sedis | 0 | 0 | 0 |
| OTU<br>_420 | Bacteria; Bacteroidetes; Bacteroidia;<br>Bacteroidales; Porphyromonadaceae;<br>Porphyromonas                                    | 0 | 0 | 0 |
| OTU<br>_464 | Bacteria; Firmicutes; Negativicutes;<br>Selenomonadales; Veillonellaceae; Veillonella                                           | 0 | 0 | 0 |
| OTU<br>_413 | Bacteria; Firmicutes; Clostridia; Clostridiales;<br>Clostridiales_Incertae_Sedis_XI; Parvimonas                                 | 0 | 0 | 0 |
| OTU<br>_446 | Bacteria; Firmicutes; Bacilli; Lactobacillales;<br>Carnobacteriaceae; Granulicatella                                            | 0 | 0 | 0 |

The median OTU-counts per condition of the biofilm grown from pooled saliva are presented with the taxonomy (assigned to the representative sequence of the OTU) as derived from the RDP-classifier/SILVA.
